# Supplementary material for: Synthesis of high-concentration B and N co-doped porous carbon polyhedra and their supercapacitive properties
Source: Royal Society of Chemistry journal article supplement (doi:10.1039/c5ra15249f), 2015-01-01
Supplement: c5ra15249f1.pdf [file c5ra15249f1.pdf]

## Synthesis of high-concentration B and N co-doped porous carbon polyhedra and their supercapacitive properties

Fei Hao,<sup>a</sup> Yue Yao,<sup>a</sup> Yapeng Li,<sup>a</sup> Chunxia Tian,<sup>a</sup> Xiaohua Zhang<sup>a\*</sup>, Jinhua Chen<sup>a\*</sup>

<sup>a</sup> State Key Laboratory of Chemo/Biosensing and Chemometrics, College of Chemistry and Chemical Engineering, Hunan University, Changsha, 410082, P.R. China

Tel./Fax: +86-731-88821818; E-mail address: [chenjinhua@hnu.edu.cn](mailto:chenjinhua@hnu.edu.cn).

### Supporting Information

**Table S1. Element distributions and porous textures of BN-PCPs and N-PCPs obtained from XPS analysis and nitrogen adsorption-desorption isotherms.**

| Sample  | At% C | At% N | At% O | At% B | S <sub>BET</sub><br>[m <sup>2</sup> g <sup>-1</sup> ] | S <sub>micro</sub><br>[m <sup>2</sup> g <sup>-1</sup> ] | Average Pore Diameter<br>[nm] | Pore Volumes<br>[cm <sup>3</sup> g <sup>-1</sup> ] |
|---------|-------|-------|-------|-------|-------------------------------------------------------|---------------------------------------------------------|-------------------------------|----------------------------------------------------|
| N-PCPs  | 90.45 | 5.05  | 4.5   | -     | 612                                                   | 537                                                     | 2.4                           | 0.37                                               |
| BN-PCPs | 67.06 | 8.10  | 14.16 | 10.68 | 57                                                    | 5                                                       | 7.2                           | 0.10                                               |

**Table S2. The values of the specific capacitances of different porous carbons reported in the literatures using three-electrode systems.**

| Material                          | Electrolyte                          | Potential range / V | Scan rate / mV s <sup>-1</sup> | Capacitance/ F g <sup>-1</sup> | N or/and B content                | Ref.      |
|-----------------------------------|--------------------------------------|---------------------|--------------------------------|--------------------------------|-----------------------------------|-----------|
| <b>MOF-derived porous carbons</b> |                                      |                     |                                |                                |                                   |           |
| BN-PCPs                           | 1.0 M H <sub>2</sub> SO <sub>4</sub> | -0.1-0.7            | 20                             | 262 F g <sup>-1</sup>          | N (8.10 at. %)<br>B (10.68 at. %) | This work |
| N-PCPs                            | 1.0 M H <sub>2</sub> SO <sub>4</sub> | -0.1-0.7            | 20                             | 84 F g <sup>-1</sup>           | N (5.05 at. %)                    | This work |
| Z-900                             | 0.5 M H <sub>2</sub> SO <sub>4</sub> | -0.2-1.0            | 20                             | 158 F g <sup>-1</sup>          | /                                 | S1        |
| NPC-800                           | 0.5 M H <sub>2</sub> SO <sub>4</sub> | 0.0-0.8             | 20                             | 238 F g <sup>-1</sup>          | N (0.80 wt. %)                    | S2        |
| CZIF69a                           | 0.5 M H <sub>2</sub> SO <sub>4</sub> | -0.241-0.759        | 20                             | 156 F g <sup>-1</sup>          | N (1.20 wt. %)                    | S3        |
| <b>B-doped porous carbons</b>     |                                      |                     |                                |                                |                                   |           |
| BNC-7                             | 6.0 M KOH                            | -0.9--0.1           | 20                             | 149 F g <sup>-1</sup>          | N (9.20 at. %)<br>B (9.60 at. %)  | S4        |
| BNC-9                             | 6.0 M KOH                            | -0.9--0.1           | 20                             | 172 F g <sup>-1</sup>          | N (7.10 at. %)<br>B (8.40 at. %)  | S4        |

|                                       |                                          |           |    |                       |                                  |    |
|---------------------------------------|------------------------------------------|-----------|----|-----------------------|----------------------------------|----|
| BNC-15                                | 6.0 M KOH                                | -0.9--0.1 | 20 | 151 F g <sup>-1</sup> | N (4.90 at. %)<br>B (4.80 at. %) | S4 |
| K-BPC                                 | 1.0 M<br>Na <sub>2</sub> SO <sub>4</sub> | -0.4-0.6  | 20 | 139 F g <sup>-1</sup> | B (0.034 at. %)                  | S5 |
| <b>Carbon aerogel-derived carbons</b> |                                          |           |    |                       |                                  |    |
| COU-2                                 | 1.0 M H <sub>2</sub> SO <sub>4</sub>     | -0.2-0.8  | 5  | 175 F g <sup>-1</sup> | Without N or B<br>doping         | S6 |
| K-COU-2                               | 1.0 M H <sub>2</sub> SO <sub>4</sub>     | -0.2-0.8  | 5  | 225 F g <sup>-1</sup> | Without N or B<br>doping         | S6 |

## References

- S1. W. Chaikittisilp, M. Hu, H. Wang, H.-S. Huang, T. Fujita, K.C.-W. Wu, L.-C. Chen, Y. Yamauchi and K. Ariga, *Chem. Commun.*, 2012, 48, 7259–7261.
- S2. N.L. Torad, R.R. Salunkhe, Y. Li, H. Hamoudi, M. Imura, Y. Sakka, C.-C. Hu and Y. Yamauchi, *Chem. Eur. J.*, 2014, 20, 7895–7900.
- S3. Q. Wang, W. Xia, W. Guo, L. An, D. Xia and R. Zou, *Chem. Asian J.*, 2013, 8, 1879–1885.
- S4. H. Guo and Q. Gao, *J. Power Sources*, 2009, 186, 551-556.
- S5. J. Zhang, J. W. Lee, *ACS Sustainable Chemistry & Engineering*, 2014, 2, 735-740.
- S6. J. Jin, S. Tanaka, Y. Egashira and N. Nishiyama, *Carbon*, 2010, 48, 1985-1989.
